# Supplementary material
Source: PubMed Central journal article supplement (PMC5833310)
Supplement: NIHMS922329-supplement.pdf [file NIHMS922329-supplement.pdf]

# Neural Signaling of Cortisol, Childhood Emotional Abuse, and Depression-related Memory Bias

## *Supplemental Information*

### **Inclusion Criteria**

- Female
- 18 to 45 years of age
- English fluency
- Able to lie still on their back for up to 90 minutes
- Willing and able to return for all visits
- Able to provide written informed consent prior to participation
- In good physical health as determined by medical history
- If a nicotine user, able to refrain from nicotine use for 2 hours prior to fMRI scanning and throughout the scan visits
- Additional criteria for never-depressed subjects: Free of current or past DSM-5 diagnoses of MDD or other depressive disorders
- Additional criteria for subjects with current or past depression: Meets DSM-5 criteria for a current or past depressive disorder diagnosis

### **Exclusion Criteria**

- Lifetime history of psychosis or mania
- Substance use disorder within the last 6 months
- Significant risk for suicide
- Claustrophobia
- Acute or chronic physical (non-psychiatric) illness
- Daily nicotine use

- Use of antidepressants, other psychotropic medication, or medications that alter glucocorticoids
- Hormonal contraceptives
- Peri- or postmenopausal signs
- Highly irregular periods
- Pregnancy or breastfeeding within the last 6 months
- Illicit drug use within the last 4 weeks (verified by negative urinary drug test)

**Table S1.** DSM-5 Diagnoses for Each Participant by CTQ Emotional Abuse Group

Table S1a. CTQ Emotional Abuse Group: **Minimal**

| Participant | Depressive Disorder Diagnoses | Other Diagnoses |
|-------------|-------------------------------|-----------------|
| 1           | None                          | None            |
| 2           | None                          | None            |
| 3           | None                          | None            |
| 4           | None                          | None            |
| 5           | None                          | None            |
| 6           | None                          | None            |
| 7           | None                          | None            |
| 8           | None                          | None            |
| 9           | None                          | None            |
| 10          | None                          | None            |
| 11          | None                          | None            |
| 12          | None                          | None            |
| 13          | None                          | None            |
| 14          | None                          | None            |
| 15          | None                          | None            |
| 16          | None                          | None            |
| 17          | None                          | None            |
| 18          | None                          | None            |
| 19          | None                          | None            |
| 20          | None                          | None            |
| 21          | None                          | None            |

| <b>Participant</b> | <b>Depressive Disorder Diagnoses</b>                                                                                                                       | <b>Other Diagnoses</b>                                  |
|--------------------|------------------------------------------------------------------------------------------------------------------------------------------------------------|---------------------------------------------------------|
| 22                 | None                                                                                                                                                       | None                                                    |
| 23                 | None                                                                                                                                                       | Social Anxiety Disorder, Performance Only               |
| 24                 | Major Depressive Disorder, Single Episode, In Full Remission                                                                                               | Specific Phobia, Animal                                 |
| 25                 | Major Depressive Disorder, Single Episode, In Full Remission                                                                                               | None                                                    |
| 26                 | Major Depressive Disorder, Recurrent Episode, In Full Remission                                                                                            | None                                                    |
| 27                 | Persistent Depressive Disorder, Early Onset, With Intermittent Major Depressive Episodes, Without Current Episode, Moderate                                | Social Anxiety Disorder                                 |
| 28                 | Major Depressive Disorder, Recurrent Episode, In Full Remission                                                                                            | None                                                    |
| 29                 | Persistent Depressive Disorder, In Full Remission, Early Onset, With Intermittent Major Depressive Episodes, Without Current Episode                       | None                                                    |
| 30                 | Major Depressive Disorder, Single Episode, In Full Remission                                                                                               | None                                                    |
| 31                 | Persistent Depressive Disorder, In Full Remission, With Intermittent Major Depressive Episodes, Without Current Episode                                    | Social Anxiety Disorder                                 |
| 32                 | Persistent Depressive Disorder, With Anxious Distress, In Full Remission, Late Onset, With Intermittent Major Depressive Episodes, Without Current Episode | None                                                    |
| 33                 | Other Specified Depressive Disorder (Depressive episode with insufficient symptoms), In Full Remission                                                     | Specific Phobia, Animal & Natural Environment           |
| 34                 | Major Depressive Disorder, Recurrent Episode, In Full Remission, With Anxious Distress                                                                     | None                                                    |
| 35                 | Major Depressive Disorder, Recurrent Episode, In Full Remission                                                                                            | None                                                    |
| 36                 | Major Depressive Disorder, Recurrent Episode, Moderate                                                                                                     | Social Anxiety Disorder<br>Generalized Anxiety Disorder |
| 37                 | Major Depressive Disorder, Recurrent Episode, In Partial Remission                                                                                         | None                                                    |

| <b>Participant</b> | <b>Depressive Disorder Diagnoses</b>                                                                                     | <b>Other Diagnoses</b>                                    |
|--------------------|--------------------------------------------------------------------------------------------------------------------------|-----------------------------------------------------------|
| 38                 | Persistent Depressive Disorder, With Intermittent Major Depressive Episodes, Without Current Episode, Moderate           | None                                                      |
| 39                 | Other Specified Depressive Disorder (Short-duration depressive episode)                                                  | None                                                      |
| 40                 | Major Depressive Disorder, Recurrent Episode, Moderate                                                                   | Social Anxiety Disorder, Performance Only                 |
| 41                 | Major Depressive Disorder, Single Episode, Mild, With Anxious Distress                                                   | Specific Phobia, Animal<br>Social Anxiety Disorder        |
| 42                 | Major Depressive Disorder, Recurrent Episode, Moderate                                                                   | Social Anxiety Disorder<br>Agoraphobia with Panic Attacks |
| 43                 | Major Depressive Disorder, Recurrent Episode, Severe, With Anxious Distress, With Seasonal Pattern                       | Social Anxiety Disorder                                   |
| 44                 | Persistent Depressive Disorder, Early Onset, With Intermittent Major Depressive Episodes, With Current Episode, Moderate | None                                                      |
| 45                 | Major Depressive Disorder, Recurrent Episode, Moderate                                                                   | Specific Phobia, Natural Environment                      |
| 46                 | Major Depressive Disorder, Recurrent Episode, In Partial Remission                                                       | Social Anxiety Disorder                                   |

Table S1b. CTQ Emotional Abuse Group: **Moderate**

| <b>Participant</b> | <b>Depressive Disorder Diagnoses</b>                                                                                                            | <b>Other Diagnoses</b>                                                                                        |
|--------------------|-------------------------------------------------------------------------------------------------------------------------------------------------|---------------------------------------------------------------------------------------------------------------|
| 1                  | None                                                                                                                                            | None                                                                                                          |
| 2                  | None                                                                                                                                            | None                                                                                                          |
| 3                  | None                                                                                                                                            | None                                                                                                          |
| 4                  | None                                                                                                                                            | None                                                                                                          |
| 5                  | None                                                                                                                                            | None                                                                                                          |
| 6                  | Other Specified Depressive Disorder (Depressive episode with insufficient symptoms)                                                             | Generalized Anxiety Disorder<br>Posttraumatic Stress Disorder, With Dissociative Symptoms (Depersonalization) |
| 7                  | Persistent Depressive Disorder, Early Onset, With Intermittent Major Depressive Episodes, Without Current Episode, Mild                         | Social Anxiety Disorder                                                                                       |
| 8                  | Major Depressive Disorder, Recurrent Episode, In Partial Remission, With Seasonal Pattern                                                       | None                                                                                                          |
| 9                  | Major Depressive Disorder, Recurrent Episode, In Full Remission, With Anxious Distress                                                          | None                                                                                                          |
| 10                 | Major Depressive Disorder, Recurrent Episode, In Full Remission, With Anxious Distress                                                          | None                                                                                                          |
| 11                 | Persistent Depressive Disorder, Late Onset, With Intermittent Major Depressive Episodes, With Current Episode, Moderate                         | Generalized Anxiety Disorder with Panic Attacks<br>Social Anxiety Disorder                                    |
| 12                 | Major Depressive Disorder, Recurrent Episode, Moderate, With Seasonal Pattern                                                                   | Social Anxiety Disorder with Panic Attacks<br>Generalized Anxiety Disorder<br>Posttraumatic Stress Disorder   |
| 13                 | Major Depressive Disorder, Recurrent Episode, Moderate                                                                                          | Generalized Anxiety Disorder with Panic Attacks<br>Social Anxiety Disorder                                    |
| 14                 | Persistent Depressive Disorder, With Anxious Distress, Early Onset, With Intermittent Major Depressive Episodes, With Current Episode, Moderate | Generalized Anxiety Disorder<br>Posttraumatic Stress Disorder                                                 |

Table S1c. CTQ Emotional Abuse Group: **Severe**

| <b>Participant</b> | <b>Depressive Disorder Diagnoses</b>                                                                                                                     | <b>Other Diagnoses</b>                                                                                                                                              |
|--------------------|----------------------------------------------------------------------------------------------------------------------------------------------------------|---------------------------------------------------------------------------------------------------------------------------------------------------------------------|
| 1                  | None                                                                                                                                                     | None                                                                                                                                                                |
| 2                  | Major Depressive Disorder, Single Episode, In Partial Remission                                                                                          | Specific Phobia, Animal                                                                                                                                             |
| 3                  | Persistent Depressive Disorder, In Full Remission, With Intermittent Major Depressive Episodes, Without Current Episode                                  | None                                                                                                                                                                |
| 4                  | Major Depressive Disorder, Recurrent Episode, In Partial Remission                                                                                       | Social Anxiety Disorder                                                                                                                                             |
| 5                  | Persistent Depressive Disorder, With Anxious Distress, In Partial Remission, Early Onset, With Intermittent Depressive Episodes, Without Current Episode | Social Anxiety Disorder                                                                                                                                             |
| 6                  | Persistent Depressive Disorder, Early Onset, With Intermittent Major Depressive Episodes, With Current Episode, Mild                                     | Posttraumatic Stress Disorder, With Dissociative Symptoms                                                                                                           |
| 7                  | Major Depressive Disorder, Recurrent Episode, In Partial Remission                                                                                       | Generalized Anxiety Disorder<br>Posttraumatic Stress Disorder                                                                                                       |
| 8                  | Persistent Depressive Disorder, Early Onset, With Intermittent Major Depressive Episodes, With Current Episode, Moderate                                 | Social Anxiety Disorder                                                                                                                                             |
| 9                  | Persistent Depressive Disorder, Early Onset, With Intermittent Major Depressive Episodes, With Current Episode, Moderate                                 | None                                                                                                                                                                |
| 10                 | Major Depressive Disorder, Recurrent Episode, Severe, With Anxious Distress                                                                              | Posttraumatic Stress Disorder with Panic Attacks<br>Other Specified Anxiety Disorder (Subthreshold generalized anxiety disorder symptoms that pre-dated depression) |
| 11                 | Persistent Depressive Disorder, Early Onset, With Persistent Major Depressive Episode, Moderate                                                          | Social Anxiety Disorder<br>Specific Phobia, Blood-Injection-Injury<br>Posttraumatic Stress Disorder with Panic Attacks, With Dissociative Symptoms                  |
| 12                 | Persistent Depressive Disorder, With Intermittent Major Depressive Episodes, With Current Episode, Moderate                                              | None                                                                                                                                                                |

| <b>Participant</b> | <b>Depressive Disorder Diagnoses</b>                                                                                   | <b>Other Diagnoses</b>                                                                                                                                    |
|--------------------|------------------------------------------------------------------------------------------------------------------------|-----------------------------------------------------------------------------------------------------------------------------------------------------------|
| 13                 | Persistent Depressive Disorder, With Anxious Distress, Early Onset, With Persistent Major Depressive Episode, Moderate | Social Anxiety Disorder<br>Posttraumatic Stress Disorder with Panic Attacks                                                                               |
| 14                 | Persistent Depressive Disorder, With Anxious Distress, With Persistent Major Depressive Episode, Moderate              | Generalized Anxiety Disorder<br>Obsessive Compulsive Disorder, With Good Insight<br>Specific Phobia, Natural Environment<br>Posttraumatic Stress Disorder |
| 15                 | Major Depressive Disorder, Recurrent Episode, Moderate, With Anxious Distress                                          | None                                                                                                                                                      |
